# Supplementary material
Source: PubMed Central journal article supplement (PMC3568625)
Supplement: AEM.03192-12_zam999104122so2.pdf [file AEM.03192-12_zam999104122so2.pdf]

1 **Supplemental Materials and Methods**

2

3 **Southern blot hybridization, PCR, and pulsed-field gels**

4 Genomic DNAs (gDNAs) were purified from 0.5 ml of overnight cultures of selected strains using the Qiagen DNeasy kit (cat# 69506) per manufacturer's instructions.

5 Approximately 0.5 µg of gDNA was digested with NEB restriction enzymes and resolved on a 0.8% agarose gel for 2 hr at 80V. Genomic DNA fragments were transferred from  
6 the gel via capillary action to an S&S Nytran SPC membrane (0.45 µm Nylon) using alkaline transfer (1). The membrane was baked for 2hr at 80C under vacuum. Hybridization  
7 was performed at 45C overnight using Roche's Dig Easy Hybridization solution. Washing, blocking and detection were accomplished according to manufacturer's directions using  
8 the Roche Wash and Block Buffer Set along with the DIG DNA Labeling and Detection Kit. Probe for *telA* was produced via PCR of *A. tumefaciens* C58 genomic DNA using the  
9 primers 5'CTAGCCATCTGCAACATGAAGA3' and 5'AGCGACGTTTCGAGGTCGTT3'. Probe for *atu2522* was produced via PCR of *A. tumefaciens* C58 genomic DNA  
10 using the primers 5'ATGATGAAACGCAATCTGATAGG3' and 5'GTCGGAATGCAGTTTTACCA3'.

11

12 PCR amplification of putative gene transfer junctions and novel genes on chromosome II (2) was conducted using the primers 5'-AGATGTCGGATTACCTCGTCAAG-3' and 5'-  
13 AGGCAGCAAACATCACTATCTCC-3' to amplify the region adjacent to *Atu3706*; primers 5'-GTCGAAGAGATTAAGCCTGTTTCC-3' and 5'-  
14 GGTTACGAGACATGGTGGACATAC-3' to amplify a region within *Atu3765*; and primers 5'-CTTTACGGTCTCCTCTATGATCAGC-3' and 5'-  
15 CACTTGGCCTGTCTTTGATGGTTG-3' to amplify a region within *Atu3669*.

16

17 Pulsed-field gel electrophoresis was conducted as previously described (3).

18

### 19 **Genome comparisons and analysis of sequence differences**

20 All primary sequence data generated by Goodner *et al.* (4) were transferred from Monsanto Company to the University of Washington genome center, along with the original DNA  
21 sample used for construction of the genomic library. Comparison of the sequences identified 37 differences. Each variant locus was amplified by PCR using DNA from the two  
22 sequenced strains and seven additional C58 culture lines (Table S4). The amplified DNA was sequenced using BigDye termination reactions (Applied Biosystems, Inc.) according  
23 to manufacturer's directions.

24

### 25 **Protein-coding gene prediction**

26 Gene predictions in the revised C58 annotation are the result of a careful evaluation of the annotation of the two original projects (4, 5) complemented by automated annotation  
27 provided by the Comprehensive Microbial Resource (CMR) (6) and EasyGene predictions (7). Orthologous groupings were computed among three sequenced *Agrobacterium*  
28 strains and other sequenced members of the Rhizobiaceae (2, 4, 5, 8-13); synteny among these genomes provided additional evidence for the presence or absence of genes. The  
29 tool OrthoMCL (14) was used for ortholog computation. Gene predictions meeting the following criteria were evaluated by a team member and deleted or modified as necessary:  
30 Genes having low similarity (BLASTP e-value higher than  $1e-15$ ; (15)) to known genes, genes that overlapped other predicted genes by more than 30 base pairs, and genes with  
31 predicted start sites more than 10 codons different from the closest predicted ortholog or paralog. Finally, all regions greater than 500 bp that lacked genes were scanned using  
32 BLASTX (15) against GenBank's non-redundant sequence repository and against the genomes of *A. vitis* S4 and *A. radiobacter* K84. As a result of this process, a number of new

33 gene predictions have been added and some original predictions were deleted. Translation starts for the accepted gene predictions were also examined and revised when  
34 appropriate, taking into account a multiple alignment of close orthologs and the presence of potential ribosomal binding sites.

35

36 The gene identifiers (also known as locus tags) for the revised C58 annotation that refer to genes that have been kept from the original annotations are the same as those defined by  
37 Wood *et al.* (5) (format AtuXXXX), which have been widely adopted in the literature. Newly-predicted genes were given the locus tag pattern Atu8XXX, as were a number of  
38 genes that were initially predicted only by Goodner *et al.* (4) or through subsequent reanalysis by Chen *et al.* (23).

39

#### 40 **Functional assignment for protein-coding genes**

41 Since the original annotations from 2001, many genes have been experimentally characterized, both in *Agrobacterium* and in related species. The annotation was updated to reflect  
42 these new analyses. Many product descriptions have also been improved using TIGRFams, a database of well characterized protein families (16).

43

#### 44 **RNA gene annotation**

45 In the original annotation, ribosomal RNAs, tRNAs, a tmRNA, and an RNase had been identified. Using data available from the RFAM database (17), we have located 24  
46 additional RNAs with special features, including 14 mRNAs with riboswitches and 10 small, non-coding RNAs. We have also added to the annotation of the linear chromosome a  
47 tRNA interrupted by a self-splicing group I intron, which had been noted by Reinhold-Hurek and Shub in the early 1990's (18) but had not been included in either of the original  
48 annotations. The locus tags of the two tRNA halves are Atu8111.1 and Atu8111.2. The intron has been added to the database as a "genome feature".

49 Putative small RNA (sRNA) genes were derived from the work of Wilms *et al.* (19) and given numbers in the *atu9xxx* format. We added only those genes for which transcripts  
50 were detected by RNA sequencing experiments (Table S4 in the Wilms *et al.* manuscript).

51

## 52 **Pseudogene annotation**

53 The original UW annotation reported 11 pseudogenes (5). The corrected C58 sequence showed that two of these putative pseudogenes are actually predicted functional genes;  
54 *Atu1168*, a bifunctional riboflavin deaminase-reductase, and *Atu3304*, a cellulose synthesis gene. Other pseudogenes or gene fragments have been added or correctly labeled, for a  
55 current total of 28 pseudogenes or gene fragments, many of which are transposon fragments. Fifteen of the 28 pseudogenes or gene fragments are located on the plasmid pAtC58.  
56 Some of the newly identified pseudogenes were found by the tool GenVar (20).

57

## 58 **Abbreviations**

59 C58, *Agrobacterium tumefaciens* C58; S4, *Agrobacterium vitis* S4; K84, *Agrobacterium radiobacter* K84; ATCC, American Type Culture Collection; PCR, Polymerase Chain  
60 Reaction; Indel, insertion or deletion mutation; NCBI, National Center for Biotechnology Information; bp, base-pairs; Kbp, kilobase-pairs; Mbp, megabase-pairs.

61

62

63

64

65 **Supplemental Figure Legend**

66 **Figure S1.**

67 Southern blot hybridization for detection of *telA*. DNA samples from the strains listed in Table S5 were digested with restriction endonucleases and hybridized at low stringency.  
68 Only Biovar 1 strains gave a detectable signal, and the restriction endonuclease digestion patterns fell into several recognizable patterns, suggesting that the strains within each  
69 pattern group are closely related. Representative blots for each group are shown. The left lane in each panel contains DNA molecular weight marker set III (Roche Applied  
70 Bioscience) labeled with digoxigenin. The size of each marker band, in base pairs, is shown to the left of Panel A. Each panel is from a different gel, so each requires reference to  
71 the panel's specific marker lane. Note that the patterns shown in panels A and F may be RFLP variants, as may panels B and G. Strains falling into a particular pattern group  
72 include: Panel A, *A. tumefaciens* strains C58 and MUM-1; Panel B, *A. tumefaciens* strains A6, Ach5, ANT4, ATCC 15955, IIBV7, Bo542, and NCPPB 396; Panel C, *A.*  
73 *tumefaciens* strains B8-806 and KU12; Panel D., *A. tumefaciens* FACH; Panel E, *A. rhizogenes* DC-AR2; Panel F, *A. tumefaciens* T37; Panel G, *A. tumefaciens* R10; Panel H, *A.*  
74 *tumefaciens* Chry5; Panel I, *A. rhizogenes* K599; Panel J, *A. tumefaciens* FA-1. Samples of DNA in panels A – I were digested (left to right) using BclI, EcoRI, HindIII, and SacII;  
75 Panel J uses identical endonucleases, except that the SacII digestion is missing.

76

77

78 **Supplemental Tables**

79

80 **Table S1.** Positions and types of sequence discrepancies between the *A. tumefaciens* C58 genome sequences produced by Goodner *et al.* (4) and Wood *et al.* (5). The locus  
 81 discussed in the text containing 16 sequence discrepancies downstream of the 16s rRNA gene at 58.3 kbp of Chromosome I is not included in the table, but is provided as a  
 82 footnote<sup>a</sup>.

| Replicon <sup>b</sup> | Position<br>C58UW <sup>c</sup> | Position<br>ATCC <sup>c</sup> | Position this<br>study <sup>c</sup> | Nucleotide<br>C58UW <sup>d</sup> | Nucleotide<br>ATCC <sup>d</sup> | Consensus<br>Nucleotide <sup>e</sup> | Difference<br>Type <sup>f</sup> | ATCC33970<br>sequence <sup>g</sup> | Mutant<br>Strain <sup>h</sup> | Mutant<br>ORF <sup>i</sup> | Coding<br>Change <sup>j</sup> |
|-----------------------|--------------------------------|-------------------------------|-------------------------------------|----------------------------------|---------------------------------|--------------------------------------|---------------------------------|------------------------------------|-------------------------------|----------------------------|-------------------------------|
| Chr. I                | 80930                          | 80729                         | 80930                               | G                                | A                               | G                                    | P                               | tcagggAtgacat                      | ATCC33970                     | Atu0079                    | P→S                           |
| Chr. I                | 156690                         | 156490                        | 156690                              | N                                | C                               | N                                    | F                               | ccccccCgcctgt                      | ATCC33970                     | Atu0148                    | F <sup>k</sup>                |
| Chr. I                | 258152                         | 257952                        | 258152                              | A                                | C                               | C                                    | P                               | cacgttCttttcc                      | C58UW                         | Atu0260                    | K→N                           |
| Chr. I                | 326648                         | 326448                        | 326648                              | A                                | T                               | T                                    | P                               | atggacTgcacatca                    | C58UW                         | Atu0332                    | R→P                           |
| Chr. I                | 326687                         | 326487                        | 326687                              | G                                | C                               | C                                    | P                               | ttttgaCgcagca                      | C58UW                         | Atu0332                    | Q→L                           |
| Chr. I                | 503054                         | 502855                        | 503055                              | N                                | C                               | C                                    | F                               | ggcggcCgcacca                      | C58UW                         | Atu8131                    | F <sup>l</sup>                |
| Chr. I                | 763961                         | 763761                        | 763962                              | C                                | N                               | C                                    | E                               | gcgccctCaacaat                     | N.A. (E)                      | N.A.                       | NONE                          |

|        |         |                   |                   |                |                 |                 |   |                       |          |         |        |
|--------|---------|-------------------|-------------------|----------------|-----------------|-----------------|---|-----------------------|----------|---------|--------|
| Chr. I | 822392  | 822191            | 822393            | C              | N               | C               | E | tccccCttgagg          | N.A. (E) | N.A.    | NONE   |
| Chr. I | 893288  | 893068-<br>893178 | 893270-<br>893380 | Seq.<br>Absent | Seq.<br>Present | Seq.<br>Present | I | See Note <sup>m</sup> | C58UW    | OUT     | NONE   |
| Chr. I | 936905  | 936795            | 936997            | G              | N               | N               | E | cccaat*gggcga         | N.A. (E) | N.A.    | NONE   |
| Chr. I | 1162733 | 1162622           | 1162824           | C              | N               | N               | E | aacccc*aacctc         | N.A. (E) | N.A.    | NONE   |
| Chr. I | 1169341 | 1169229           | 1169431           | C              | N               | N               | E | aggccc*ggggag         | N.A. (E) | N.A.    | NONE   |
| Chr. I | 1220123 | 1220010           | 1220212           | G              | N               | N               | F | gggggg*ctttg          | C58UW    | OUT     | NONE   |
| Chr. I | 1310128 | 1310015           | 1310217           | G              | A               | A               | P | accatcAccgtca         | C58UW    | Atu1319 | T→A    |
| Chr. I | 1446784 | 1446670           | 1446873           | A              | N               | A               | E | tcgaaaAgcagtg         | N.A. (E) | N.A.    | NONE   |
| Chr. I | 1617958 | 1617844           | 1618047           | G              | C               | C               | P | cggggcCgatgaa         | C58UW    | Atu1632 | SILENT |
| Chr. I | 1624250 | 1624137           | 1624339           | N              | A               | N               | E | taaaat*aaataa         | N.A. (E) | N.A.    | NONE   |
| Chr. I | 1661908 | 1661794           | 1661997           | A              | N               | A               | E | tttgaaAcagctt         | N.A. (E) | N.A.    | NONE   |
| Chr. I | 1906754 | 1906641           | 1906844           | C              | N               | C               | E | ccttggCcgaacg         | N.A. (E) | N.A.    | NONE   |
| Chr. I | 2090637 | 2090524           | 2090726           | A              | T               | A               | E | tttccAgatccc          | N.A. (E) | N.A.    | NONE   |
| Chr. I | 2236399 | 2236285           | 2236640           | C              | N               | N               | E | cccccc*tctgcc         | N.A. (E) | N.A.    | NONE   |

|         |         |                   |                   |                |                 |                 |   |                       |          |         |                |
|---------|---------|-------------------|-------------------|----------------|-----------------|-----------------|---|-----------------------|----------|---------|----------------|
| Chr. I  | 2359302 | 2359188           | 2359390           | T              | C               | T               | E | gagatgTccggca         | N.A. (E) | N.A.    | NONE           |
| Chr. I  | 2380180 | 2380066           | 2380268           | T              | C               | C               | E | tctcccCccttga         | N.A. (E) | N.A.    | NONE           |
| Chr. I  | 2401441 | 2401328           | 2401426           | N              | C               | N               | E | gatgcc*cggcag         | N.A. (E) | N.A.    | NONE           |
| Chr. I  | 2604773 | 2604661           | 2604862           | N              | G               | N               | E | cgacga*gcttac         | N.A. (E) | N.A.    | NONE           |
| Chr. I  | 2626194 | 2626083           | 2626283           | N              | G               | N               | E | gctggc*gcgcgg         | N.A. (E) | N.A.    | NONE           |
| Chr. I  | 2670041 | 2669930           | 2670130           | G              | T               | G               | E | ggtgacGccttcc         | N.A. (E) | N.A.    | NONE           |
| Chr. I  | 2761079 | 2760968           | 2761168           | G              | A               | A               | P | tacgagAcggaag         | C58UW    | Atu2759 | T→A            |
| Chr. I  | 2825552 | 2825441           | 2825641           | A              | G               | G               | P | acgcccGaaatct         | C58UW    | Atu2822 | E→K            |
| Chr. II | 173     | 2074583           | 181               | T              | G               | T               | E | aatcagTtttgtc         | N.A. (E) | N.A.    | NONE           |
| Chr. II | 173787  | 1900969           | 173795            | G              | A               | A               | E | tgcgggAccgatg         | N.A. (E) | N.A.    | NONE           |
| Chr. II | 1507966 | 566791            | 1507974           | G              | N               | N               | F | tttgcc*ggcatg         | C58UW    | Atu4370 | F <sup>n</sup> |
| Chr. II | 1628558 | 446200            | 1628566           | T              | N               | N               | E | ccaacg*ttgaaa         | N.A. (E) | N.A.    | NONE           |
| Chr. II | 1760142 | 314615            | 1760150           | N              | T               | T               | E | ttgcgcTttttt          | N.A. (E) | N.A.    | NONE           |
| pATC58  | 128201  | 128503-<br>128592 | 128196-<br>128285 | Seq.<br>Absent | Seq.<br>Present | Seq.<br>Present | I | See Note <sup>o</sup> | C58UW    | Atu5121 | I <sup>p</sup> |



|        |        |        |        |   |   |   |   |               |          |      |      |
|--------|--------|--------|--------|---|---|---|---|---------------|----------|------|------|
| pATC58 | 400626 | 401022 | 400715 | G | N | N | E | acgggg*ccggcg | N.A. (E) | N.A. | NONE |
| pATC58 | 464502 | 464899 | 464591 | N | A | N | E | caatga*atcagg | N.A. (E) | N.A. | NONE |

83

84

85

86 <sup>a</sup> The sequence around the differing region of the rRNA loci are shown below. Variants are shown in bold:

87 C58UW - GTAAGACG**ATCGCACCGA**-TCTTCG**GATCAACGCGGT**ATGAA

88 ATCC33970 -GTAAGACG**CTCCGGACAAGT**CCTTCG**ACTTGCC****TTGAG**ATGAA

89

90 <sup>b</sup>The replicon on which the designated sequence discrepancy resides. Chr. I, Chromosome I; Chr. II, Chromosome II. The two genome projects had no discrepancies in the  
91 sequence of pTiC58.

92 <sup>c</sup>Position of the sequence discrepancy in the original C58UW sequence files, the original ATCC33970 sequence files or the current ATCC33970 sequence files respectively.

93 Renumbering of the current ATCC33970 sequence files followed the addition of telomere sequences and corrections noted in the text.

94 <sup>d</sup>Nucleotide at the sequence discrepancy in the designated sequence. N denotes that no nucleotide was called at the analogous position in the designated sequence.

95 <sup>e</sup>Consensus nucleotide at the variant locus based on comparison of all C58 strains shown in table S4. These data are used to determine which of the two sequenced strains has  
96 acquired a mutation at that locus. The correct sequence is noted in the case of a base calling error by one project team or the other.

97 <sup>f</sup>The types of sequence discrepancies identified. E, Base-calling error by one project team or the other; I, Large Indel; F, Single-base frameshift; P, single-base point mutation.

98 <sup>g</sup>The sequence of ATCC33970 surrounding the point of the sequence discrepancy. Capital letters indicate the location of the consensus base, according to sequencing of reference  
99 strains (see text). An asterisk (\*) indicates the approximate location of the erroneous base call; note that it is not possible to identify which base in a string of identical bases was  
100 called incorrectly.

101 <sup>h</sup>To determine which of the two strains harbors a mutation at a given locus, both sequences were compared to the consensus sequence generated from the strains listed in Table S4.  
102 Note that at each variant position either C58UW or ATCC33970 matched all other C58 strains tested. N.A. indicates that neither strain is mutated at that position since the  
103 difference in the sequence derives from an initial base-calling error.

104 <sup>i</sup>The ORF designation indicates the locus ID of the open reading frame in which this variation is located. N.A. indicates that neither strain is a variant. OUT indicates that the  
105 variation is outside a predicted open reading frame, although some may be located in regulatory regions.

106 <sup>j</sup>Denotes the specific amino acid change seen in the mutant with respect to the consensus matched sequence. Note in all but the first two rows the mutations are found in C58UW.  
107 Single amino acid codes are shown separated by an arrow (→) indicating the amino acid found in the wild type strain and mutant respectively as defined in the mutant strain  
108 column. NONE indicates that the mutation was outside of an open reading frame. SILENT indicates no change in the encoded amino acid. F indicates a frameshift.

109 <sup>k</sup>The frameshift mutation in C58UW alters amino acids starting at position 198 to read as follows: HDGKACLGCGKRQAASDRARFTLCRR.

110 <sup>l</sup>Atu8131 is the wild-type version of a mutant gene designated Atu0512 by Wood et al. (5). The two genes differ in their N-terminal region, upstream of the frameshift mutation.

111 <sup>m</sup>The sequence of nucleotides deleted at this location in strain C58UW is:  
112 5'ccccctcaaggggggagatcgatctgcgcaaggtttcggccatctcaacctttgaggatgaagcgacgaaagggcctcctccgatctcccccttgagggggagatgcc3'.

113 <sup>n</sup>The frameshift mutation in C58UW alters amino acids starting at position 390 to read as follows: 389-

114 DMPIGTLSGGNQQKIFISRWLATSPKLLLLDDPTKGIDLGAKADLFALMRQQADAGATILLYSSEDAEILEYADRILVFNGGRISAELTG

115 ADMTSVNMTRAAYGDAA.

116 <sup>o</sup>The sequence of nucleotides deleted at this location in strain C58UW is:

117 5'agcagatcgtcattgcaaggcagatcagtaccgtgcggcggtgtggctgactattcgcttcacccggtaaaaacatgctgaggctcggc 3'.

118 <sup>p</sup>The deletion in C58UW removed the following amino acids from Atu5121 of ATCC33970 starting at position 34: PSLDMFLPDEANSQPHRRTVLICLAMDDL.

119



|     |                                |    |   |    |   |   |   |   |   |                |   |   |   |
|-----|--------------------------------|----|---|----|---|---|---|---|---|----------------|---|---|---|
| 139 | Chr                            | 11 | 1 | 13 | 1 | 8 | 2 | 1 | 2 | 6 <sup>c</sup> | 0 | 9 | 0 |
| 140 | P42c                           | 0  | 0 | 0  | 0 | 0 | 0 | 0 | 0 | 0              | 0 | 1 | 0 |
| 141 | P42e                           | 0  | 0 | 1  | 0 | 0 | 0 | 1 | 0 | 0              | 0 | 0 | 0 |
| 142 | P42f                           | 0  | 0 | 0  | 0 | 0 | 0 | 0 | 0 | 1 <sup>a</sup> | 0 | 0 | 0 |
| 143 | <i>Rhizobium leguminosarum</i> |    |   |    |   |   |   |   |   |                |   |   |   |
| 144 | Chr                            | 3  | 1 | 0  | 0 | 2 | 2 | 1 | 0 | 7 <sup>a</sup> | 1 | 6 | 0 |
| 145 | PRL9                           | 0  | 0 | 0  | 0 | 0 | 0 | 0 | 0 | 1 <sup>a</sup> | 0 | 0 | 0 |
| 146 | pRL10                          | 0  | 0 | 1  | 0 | 0 | 0 | 0 | 0 | 0              | 0 | 0 | 0 |
| 147 | PRL12                          | 0  | 0 | 0  | 0 | 0 | 0 | 0 | 0 | 1 <sup>a</sup> | 0 | 0 | 0 |
| 148 | <i>Sinorhizobium meliloti</i>  |    |   |    |   |   |   |   |   |                |   |   |   |
| 149 | Chr                            | 15 | 0 | 47 | 1 | 1 | 0 | 5 | 2 | 4 <sup>b</sup> | 0 | 0 | 0 |
| 150 | pSymB                          | 1  | 1 | 15 | 2 | 1 | 0 | 3 | 1 | 0              | 0 | 1 | 0 |
| 151 | <i>Mesorhizobium loti</i>      |    |   |    |   |   |   |   |   |                |   |   |   |
| 152 | Chr                            | 0  | 0 | 0  | 0 | 6 | 2 | 7 | 2 | 0              | 0 | 6 | 0 |

153

154

155 <sup>a</sup>The full KE3 elements have internal spacers of <50 bp.

156 <sup>b</sup>The full KE3 elements have internal spacers of >100 bp.

157 <sup>c</sup>Five of the KE3 elements have internal spacers of <50 bp, and one has an internal spacer of >100 bp.

158 **Table S3.** Repeat elements that overlap open reading frames in the *A. tumefaciens* C58 Genome. None of these intragenic repetitive elements are found in orthologous genes in  
159 the *A. tumefaciens* H13-3 genome.

160

| 161 | B. | <u>Repeat Type</u> | <u>Gene ID</u> | <u>Encoded Protein</u>                                  |
|-----|----|--------------------|----------------|---------------------------------------------------------|
| 162 |    | AgroCir1           | Atu0976        | CycL cytochrome C-type biogenesis transmembrane protein |
| 163 |    |                    |                |                                                         |
| 164 |    | AgroCir2           | Atu1168        | RibD bifunctional riboflavin deaminase/reductase        |
| 165 |    | AgroCir2           | Atu1660        | hypothetical protein                                    |
| 166 |    | AgroCir2           | Atu2001        | UvrB excinuclease ABC subunit B                         |
| 167 |    | AgroCir2           | Atu2192        | hypothetical protein                                    |
| 168 |    | AgroCir2           | Atu8020        | hypothetical protein                                    |
| 169 |    |                    |                |                                                         |
| 170 |    | KE3                | Atu0805        | hypothetical protein                                    |
| 171 |    | KE3                | Atu1026        | hypothetical protein                                    |
| 172 |    | KE3                | Atu1427        | hypothetical protein                                    |
| 173 |    | KE3                | Atu1896        | hypothetical protein                                    |

174

175 **Table S4.** Strains used as sequence references when comparing the two sequenced versions of *A. tumefaciens* C58 (4, 5). All strains except the “original isolate” probably derive  
176 from the same C58 culture sent from E. Nester to J. Schell in 1971.

177

Strain Designation

Notes on Strain

C58 (original isolate)

This is from the original Cornell University strain collection. Originally collected in 1958 by Kenneth Parker from a Mazzard rootstock of a one-year old tart cherry tree (*Prunus cerasus*) near Sodus, NY (21, 22). The “C” in the strain name designates Cherry, the “58” designates the year collected). The culture was passed an unspecified

number of times for storage before  
being lyophilized in 1979. The  
Cornell stock number is 1512. The  
strain was discussed and distributed  
by Steven Beer to attendees of the  
Crown Gall Conference at Cornell  
University in 2003.

C58C1

A derivative of C58 cured of pTiC58 by  
the Jeff Schell group (23). Obtained by S.  
Farrand from Jacques Tempé. Probably  
identical to C58C9 (24) but may have been  
misnamed in early literature.

C58C1RS

Derivative of C58C1 resistant to rifampicin  
and streptomycin (24). Obtained by S.  
Farrand from Allen Kerr.



|             |                                                                                                                                                               |
|-------------|---------------------------------------------------------------------------------------------------------------------------------------------------------------|
| GV3101arg13 | An arginine auxotroph of C58 strain 78<br>GV3101. Received by S. Farrand from<br>G.R.K. Sastry. Originated in the laboratory<br>of Marc Van Montague.         |
| GMI9017     | A derivative of GMI9027 that is cured of<br>pAtC58 (25). GMI9027 is a C58<br>derivative resistant to rifampicin,<br>spectinomycin, and possibly streptomycin. |
| UIA5        | A derivative of GMI9017 that is cured of<br>pTiC58. Produced in the laboratory of S.<br>Farrand.                                                              |
| K439        | A derivative of C58C1ChlEry harboring<br>pWI1000, a conjugation-constitutive<br>mutant of pTiC58 (26). Obtained by S.<br>Farrand from Allen Kerr.             |

179

180 **Table S5.** Survey of *Agrobacterium* strains for *telA*, *acvB*, and the presence of a linear chromosome II. A (+) indicates that the gene (or linear chromosome) was detected, a (–)  
 181 indicates that it was not detected, and a NT indicates that it was not tested for a particular strain.

182

| <u>Biovar</u> | <u>Agrobacterium Strain</u>      | <u>telA</u> | <u>Atu2522</u> | <u>Linear ChrII</u> | <u>Source</u>                                  | <u>Host / Origin / Isolated By (if known)</u> |
|---------------|----------------------------------|-------------|----------------|---------------------|------------------------------------------------|-----------------------------------------------|
| 1             | <i>tumefaciens</i> C58UW         | +           | +              | +                   | D. Wood<br>American Type Culture<br>Collection | Cherry gall / New York / Kenneth Parker       |
| 1             | <i>tumefaciens</i> C58 ATCC33970 | +           | +              | +                   |                                                | Cherry gall / New York / Kenneth Parker       |
| 1             | <i>tumefaciens</i> A6            | +           | +              | +                   | D. Wood                                        | Black raspberry gall, Iowa                    |
| 1             | <i>tumefaciens</i> Ach5          | +           | NT             | NT                  | D. Wood                                        | Robert Dickey, Cornell University             |
| 1             | <i>tumefaciens</i> ATCC15955     | +           | +              | +                   | S. Farrand<---E. Nester                        | Tomato gall California / J.E. DeVay           |
| 1             | <i>tumefaciens</i> IIBV7         | +           | +              | NT                  | S. Farrand<---M. Tate                          | Chrysanthemum gall / Germany                  |
| 1             | <i>tumefaciens</i> ANT4          | +           | +              | NT                  | S. Farrand<---Y. Dessaux                       | Crown gall on Ficus / France                  |
| 1             | <i>tumefaciens</i> B6-806        | +           | +              | +                   | S. Farrand<---E. Nester                        | Tomato gall / Iowa                            |
| 1             | <i>tumefaciens</i> Bo542         | +           | +              | NT                  | S. Farrand<---E. Nester                        | Dahlia gall / Germany                         |

|                           |                              |   |    |    |                          |                                 |
|---------------------------|------------------------------|---|----|----|--------------------------|---------------------------------|
| 1                         | <i>tumefaciens</i> Chry5     | + | +  | +  | S. Farrand<---S. Pueppke | Chrysanthemum gall / Florida    |
| 1                         | <i>tumefaciens</i> FA-1      | + | +  | +  | S. Farrand<---P. Dion    | Quebec / grape                  |
| 1                         | <i>tumefaciens</i> FACH      | + | +  | +  | S. Farrand<---P. Dion    | Quebec / grape                  |
| 1                         | <i>tumefaciens</i> KU12      | + | +  | NT | D. Wood                  |                                 |
| 1                         | <i>tumefaciens</i> MUM1      | + | +  | NT | S. Farrand<---M. Schroth | Chrysanthemum gall / California |
| 1                         | <i>tumefaciens</i> NCPPB 396 | + | +  | NT | S. Farrand               |                                 |
| 1                         | <i>tumefaciens</i> R10       | + | +  | +  | S. Farrand<---J. Tempé   | Vigne gall / Romania            |
| 1                         | <i>tumefaciens</i> T37       | + | +  | +  | S. Farrand<---P. Dion    | Walnut gall / California        |
| 1                         | <i>rhizogenes</i> K599       | + | +  | +  | S. Farrand<---A. Kerr    | Hairy root on cucumber / UK     |
| 1                         | <i>rhizogenes</i> DC-AR2     | + | +  | NT | S. Farrand<---N. Tanaka  | Hairy root on melon / Japan     |
| Intermediate <sup>a</sup> | <i>tumefaciens</i> NA164     | - | NT | NT | S. Farrand<---P. Dion    | Quebec                          |
| 2                         | <i>tumefaciens</i> 28        | - | -  | -  | S. Farrand<---P. Dion    | Quebec                          |
| 2                         | <i>tumefaciens</i> 180       | - | -  | -  | S. Farrand<---P. Dion    | Quebec                          |
| 2                         | <i>tumefaciens</i> AB2/73    | - | -  | -  | S. Farrand<---L. Moore   | Lippia gall / Arizona           |
| 2                         | <i>tumefaciens</i> EU2       | - | -  | -  | S. Farrand               | Euonymous gall / Illinois       |

|   |                             |   |    |    |                             |                                          |
|---|-----------------------------|---|----|----|-----------------------------|------------------------------------------|
| 2 | <i>tumefaciens</i> EU3-2 NK | - | -  | NT | S. Farrand                  | Euonymous gall / Illinois                |
| 2 | <i>tumefaciens</i> J84/95   | - | -  | NT | S. Farrand<---L . Moore     | Apple gall / California                  |
| 2 | <i>tumefaciens</i> J73      | - | -  | -  | S. Farrand<---J.Thomson     | Prunus gall / South Africa               |
| 2 | <i>tumefaciens</i> K108     | - | -  | NT | S. Farrand<---A. Kerr       | Almond gall / South Australia            |
| 2 | <i>tumefaciens</i> NA147    | - | -  | -  | S. Farrand<---P. Dion       | Quebec                                   |
| 2 | <i>tumefaciens</i> NA167    | - | -  | NT | S. Farrand<---P. Dion       | Quebec                                   |
| 2 | <i>tumefaciens</i> NA567    | - | -  | -  | S. Farrand<---P. Dion       | Quebec                                   |
| 2 | <i>tumefaciens</i> Plum 3-5 | - | -  | NT | S. Farrand<---M. Schroth    | Crown gall on Prunus / California        |
| 2 | <i>tumefaciens</i> AG44     | - | NT | NT | E. Nester                   | Frank White                              |
| 2 | <i>rhizogenes</i> 8196      | - | -  | -  | S. Farrand<---J. Lippincott | Hairy root on apple / Riker              |
| 2 | <i>rhizogenes</i> A4        | - | -  | -  | S. Farrand<---J. Tempé      | Hairy root on rose / California          |
| 2 | <i>rhizogenes</i> TR7       | - | NT | -  | S. Farrand<---J. Lippincott | Hairy root on apple / Wisconsin          |
| 2 | <i>radiobacter</i> K84      | - | -  | -  | E. Nester                   | Soil around peach gall / South Australia |
|   |                             |   |    |    |                             | Soil around galled almond tree /         |
| 2 | <i>radiobacter</i> K112     | - | -  | NT | S. Farrand<---A. Kerr       | South Australia                          |

|   |                           |   |    |    |                           |                             |
|---|---------------------------|---|----|----|---------------------------|-----------------------------|
| 2 | <i>radiobacter</i> F64/95 | - | -  | -  | S. Farrand<---L . Moore   | Apple gall / Washington     |
| 3 | <i>vitis</i> S4           | - | NT | -  | T. Burr <--- E. Szegedi   | Hungary / E. Szegedi        |
| 3 | <i>vitis</i> F2/5         | - | NT | -  | T. Burr <--- J. Staphorst | South Africa / J. Staphorst |
| 3 | <i>vitis</i> CG49         | - | -  | NT | T. Burr                   | Grape / New York            |
| 3 | <i>vitis</i> CG56         | - | -  | NT | T. Burr                   | Michigan                    |
| 3 | <i>vitis</i> CG60         | - | -  | NT | T. Burr                   | New York                    |
| 3 | <i>vitis</i> CG78         | - | -  | NT | T. Burr                   | New York                    |
| 3 | <i>vitis</i> CG81         | - | -  | NT | T. Burr                   | Michigan                    |
| 3 | <i>vitis</i> CG88         | - | -  | NT | T. Burr                   | New York                    |
| 3 | <i>vitis</i> CG98         | - | -  | NT | T. Burr                   | Virginia                    |
| 3 | <i>vitis</i> CG101        | - | -  | NT | T. Burr                   | Virginia                    |
| 3 | <i>vitis</i> CG102        | - | -  | NT | T. Burr                   | Virginia                    |
| 3 | <i>vitis</i> CG106        | - | -  | NT | T. Burr                   | Mississippi                 |
| 3 | <i>vitis</i> CG108        | - | -  | NT | T. Burr                   | New Mexico                  |
| 3 | <i>vitis</i> CG213        | - | -  | NT | T. Burr                   | Grape sap / New York        |

|   |                                   |   |   |    |                       |                           |
|---|-----------------------------------|---|---|----|-----------------------|---------------------------|
| 3 | <i>vitis</i> CG228                | - | - | NT | T. Burr               | New York                  |
| 3 | <i>vitis</i> CG407                | - | - | NT | T. Burr               | Roots / New York          |
| 3 | <i>vitis</i> CG412                | - | - | NT | T. Burr               | Soil / New York           |
| 3 | <i>vitis</i> CG415                | - | - | NT | T. Burr               | Grape sap / New York      |
| 3 | <i>vitis</i> CG424                | - | - | NT | T. Burr               | Soil / New York           |
| 3 | <i>vitis</i> CG437                | - | - | NT | T. Burr               | Soil / Virginia           |
| 3 | <i>vitis</i> CG448                | - | - | NT | T. Burr               | Cutting callus / New York |
| 3 | <i>vitis</i> CG475                | - | - | NT | T. Burr               | Grape root / New Mexico   |
| 3 | <i>vitis</i> CG608                | - | - | NT | T. Burr               | Cutting callus / New York |
| 3 | <i>vitis</i> CG624                | - | - | NT | T. Burr               | Cutting callus / New York |
| 3 | <i>vitis</i> CG667                | - | - | NT | T. Burr               | Sap / New York            |
| 3 | <i>vitis</i> CG714                | - | - | NT | T. Burr               | Cutting callus / New York |
| 3 | <i>vitis</i> CG964 (NW161)        | - | - | NT | T. Burr <--- E. Bien  | Germany                   |
| 3 | <i>vitis</i> CG968 (IIPV-BO-2147) | - | - | NT | T. Burr <--- C. Bazzi | Cutting callus / Italy    |
| 3 | <i>vitis</i> CG988 (NW165)        | - | - | NT | T. Burr <--- E. Bien  | Germany                   |

|   |                                 |   |    |    |                           |                          |
|---|---------------------------------|---|----|----|---------------------------|--------------------------|
| 3 | <i>vitis</i> CG1005 (K306)      | - | -  | NT | T. Burr <--- A. Kerr      | Australia                |
| 3 | <i>vitis</i> CG1055             | - | -  | NT | T. Burr                   | Grape gall / Mississippi |
| 3 | <i>vitis</i> CG1082 (TM4)       | - | -  | NT | T. Burr <--- E. Szegedi   | Hungary                  |
| 3 | <i>vitis</i> CG1083 (Sz2)       | - | -  | NT | T. Burr <--- E. Szegedi   | Hungary                  |
| 3 | <i>vitis</i> CG1106 (NW11)      | - | -  | NT | T. Burr <--- L. Otten     | Germany                  |
| 3 | <i>vitis</i> CG1107 (NW113)     | - | -  | NT | T. Burr <--- L. Otten     | Germany                  |
| 3 | <i>vitis</i> CG1115 (A,yolu2.1) | - | -  | NT | T. Burr <--- S. Maden     | Turkey                   |
| 3 | <i>vitis</i> CG1116 (Fid2.3)    | - | -  | NT | T. Burr <--- S. Maden     | Turkey                   |
| 3 | <i>vitis</i> CG1126             | - | -  | NT | T. Burr <--- E. Szegedi   | Hungary                  |
| 3 | <i>vitis</i> At2                | - | NT | NT | E. Nester                 |                          |
| 3 | <i>vitis</i> At6                | - | NT | NT | E. Nester                 |                          |
| 3 | <i>vitis</i> CG47               | - | NT | NT | E. Nester <---T. Burr     | Grape gall / New York    |
| 3 | <i>vitis</i> AB4                | - | NT | NT | E. Nester <--- E. Szegedi |                          |
| 3 | <i>vitis</i> SZ1                | - | NT | NT | E. Nester <--- E. Szegedi |                          |
| 3 | <i>vitis</i> AG162              | - | NT | NT | E. Nester                 | Grapevine tumor / USSR   |

|   |                   |   |    |    |                            |                                 |
|---|-------------------|---|----|----|----------------------------|---------------------------------|
| 3 | <i>vitis</i> K305 | - | NT | NT | S. Farrand <--- A. Kerr    | Australia / A. Kerr             |
| 3 | <i>vitis</i> K308 | - | NT | NT | S. Farrand <--- A. Kerr    | Grape gall / South Australia    |
| 3 | <i>vitis</i> K309 | - | NT | NT | S. Farrand <--- A. Kerr    | Grape gall / South Australia    |
|   |                   |   |    |    |                            | Agrocin-producing nonpathogen / |
| 3 | <i>vitis</i> H6   | - | NT | NT | S. Farrand <--- J. Thomson | South Africa / R. Goodman       |
| 3 | <i>vitis</i> S2/3 | - | NT | NT | S. Farrand <--- R. Goodman | Hungary                         |
| 3 | <i>vitis</i> Hm1  | - | NT | NT | S. Farrand <--- L. Otten   | Grape gall / France             |
| 3 | <i>vitis</i> 2608 | - | NT | NT | S. Farrand <--- L. Otten   | Grape gall / France             |
| 3 | <i>vitis</i> 2641 | - | NT | NT | S. Farrand <--- L. Otten   | Grape gall / France             |
| 3 | <i>vitis</i> Ag57 | - | NT | NT | S. Farrand <--- R. Goodman | Grape / Greece                  |

183 <sup>a</sup> This strain has an intermediate phenotype. It has the Biovar 1 characteristic of 3-ketolactose production, and the Biovar 2 characteristics of growth on erythritol  
184 as a sole carbon source and sensitivity to 2% NaCl.

185



186 **Table S6.** Biovar I-specific protein-coding genes. These genes were identified using the Phylogenetic Profiler function within the IMG database (img.jgi.doe.gov). Biovar I-  
187 specific genes are those conserved at >70% amino acid sequence identity within Biovar I genomes (C58, H13-3, & ATCC31749 [draft]) but not found within any other non-Biovar  
188 I member of the Rhizobiaceae at >30% amino acid sequence identity.

| IMG Gene_oid<br>Number | Locus Tag | Product Name                                                   |
|------------------------|-----------|----------------------------------------------------------------|
| 639295636              | Atu0146   | sulfite reductase (NADPH) alpha subunit (EC 1.8.1.2) (IMGterm) |
| 639295657              | Atu0167   | transcriptional regulator, AraC family (IMGterm)               |
| 639295689              | Atu0200   | hypothetical protein                                           |
| 639295725              | Atu0236   | hypothetical protein                                           |
| 639295732              | Atu0243   | hypothetical protein                                           |
| 639295746              | Atu0257   | hypothetical protein                                           |
| 639295756              | Atu0267   | hypothetical protein                                           |
| 639295757              | Atu0268   | hypothetical protein                                           |
| 639295806              | Atu0317   | hypothetical protein                                           |
| 639295985              | Atu0496   | hypothetical protein                                           |

|           |         |                                                  |
|-----------|---------|--------------------------------------------------|
| 639295993 | Atu0504 | hypothetical protein                             |
| 639296020 | Atu0531 | hypothetical protein                             |
| 639296077 | Atu0588 | hypothetical protein                             |
| 639296086 | Atu0597 | hypothetical protein                             |
| 639296149 | Atu0660 | mannosylfructose-phosphate phosphatase (IMGterm) |
| 639296375 | Atu0886 | hypothetical protein                             |
| 639296381 | Atu0892 | hypothetical protein                             |
| 639296413 | Atu0924 | hypothetical protein                             |
| 639296432 | Atu0943 | hypothetical protein                             |
| 639296472 | Atu0983 | hypothetical protein                             |
| 639296497 | Atu1008 | hypothetical protein                             |
| 639296507 | Atu1018 | hypothetical protein                             |
| 639296535 | Atu1046 | ABC transporter, substrate binding protein       |
| 639296568 | Atu1079 | hypothetical protein                             |
| 639296627 | Atu1138 | protease VII precursor                           |

|           |         |                                                  |
|-----------|---------|--------------------------------------------------|
| 639296636 | Atu1147 | hypothetical protein                             |
| 639296639 | Atu1150 | hypothetical protein                             |
| 639296644 | Atu1155 | hypothetical protein                             |
| 639296691 | Atu1203 | hypothetical protein                             |
| 639296701 | Atu1213 | hypothetical protein                             |
| 639296831 | Atu1343 | hypothetical protein                             |
| 639296927 | Atu1439 | hypothetical protein                             |
| 639296991 | Atu1503 | hypothetical protein                             |
| 639297041 | Atu1553 | hypothetical protein                             |
| 639297056 | Atu1568 | transcriptional regulator, TetR family (IMGterm) |
| 639297150 | Atu1662 | hypothetical protein                             |
| 639297204 | Atu1716 | hypothetical protein                             |
| 639297215 | Atu1727 | hypothetical protein                             |
| 639297225 | Atu1737 | hypothetical protein                             |
| 639297259 | Atu1771 | hypothetical protein                             |

|           |         |                      |
|-----------|---------|----------------------|
| 639297265 | Atu1777 | hypothetical protein |
| 639297269 | Atu1781 | hypothetical protein |
| 639297293 | Atu1805 | hypothetical protein |
| 639297351 | Atu1863 | permease             |
| 639297353 | Atu1865 | hypothetical protein |
| 639297442 | Atu1954 | hypothetical protein |
| 639297460 | Atu1972 | hypothetical protein |
| 639297461 | Atu1973 | hypothetical protein |
| 639297490 | Atu2002 | esterase/lipase      |
| 639297521 | Atu2033 | hypothetical protein |
| 639297561 | Atu2074 | hypothetical protein |
| 639297623 | Atu2137 | hypothetical protein |
| 639297675 | Atu2189 | hypothetical protein |
| 639297684 | Atu2198 | hypothetical protein |
| 639297729 | Atu2243 | hypothetical protein |

|           |         |                                            |
|-----------|---------|--------------------------------------------|
| 639297812 | Atu2326 | hypothetical protein                       |
| 639297856 | Atu2370 | hypothetical protein                       |
| 639297860 | Atu2374 | hypothetical protein                       |
| 639297873 | Atu2387 | NTP pyrophosphohydrolase, MutT family      |
| 639297918 | Atu2432 | hypothetical protein                       |
| 639297959 | Atu2473 | ABC transporter, substrate binding protein |
| 639297961 | Atu2475 | ABC transporter, membrane spanning protein |
| 639297982 | Atu2496 | hypothetical protein                       |
| 639297988 | Atu2502 | heme oxygenase                             |
| 639298009 | Atu2523 | hypothetical protein                       |
| 639298012 | Atu2526 | hypothetical protein                       |
| 639298019 | Atu2533 | hypothetical protein                       |
| 639298193 | Atu2707 | rhizobiocin                                |
| 639298283 | Atu2797 | cobalamin biosynthesis protein             |
| 639298292 | Atu2806 | hypothetical protein                       |

|           |         |                                                                                              |
|-----------|---------|----------------------------------------------------------------------------------------------|
| 639298345 | Atu3024 | carbohydrate ABC transporter substrate-binding protein, CUT1 family (TC 3.A.1.1.-) (IMGterm) |
| 639298346 | Atu3025 | oligo alginate lyase                                                                         |
| 639298366 | Atu3045 | hypothetical protein                                                                         |
| 639298378 | Atu3057 | hypothetical protein                                                                         |
| 639298413 | Atu3092 | hypothetical protein                                                                         |
| 639298450 | Atu3129 | polygalacturonase-like protein                                                               |
| 639298451 | Atu3130 | carbohydrate ABC transporter substrate-binding protein, CUT1 family (TC 3.A.1.1.-) (IMGterm) |
| 639298459 | Atu3138 | hypothetical protein                                                                         |
| 639298467 | Atu3146 | proline dipeptidase                                                                          |
| 639298478 | Atu3157 | ABC transporter, membrane spanning protein [C4-dicarboxylate]                                |
| 639298596 | Atu3275 | invasion associated locus B                                                                  |
| 639298608 | Atu3287 | thiamine biosynthesis associated protein                                                     |
| 639298654 | Atu3336 | hypothetical protein                                                                         |

|           |         |                                                                                                   |
|-----------|---------|---------------------------------------------------------------------------------------------------|
| 639298683 | Atu3365 | hypothetical protein                                                                              |
| 639298702 | Atu3384 | hypothetical protein                                                                              |
| 639298787 | Atu3469 | phosphoglycerate mutase (EC 5.4.2.1) (IMGterm)                                                    |
| 639298817 | Atu3499 | hypothetical protein                                                                              |
| 639298840 | Atu3522 | glucans biosynthesis protein                                                                      |
| 639298851 | Atu3533 | monosaccharide ABC transporter substrate-binding protein,<br>CUT2 family (TC 3.A.1.2.-) (IMGterm) |
| 639298866 | Atu3548 | glycosyltransferase                                                                               |
| 639298867 | Atu3549 | hypothetical protein                                                                              |
| 639298868 | Atu3550 | succinoglycan biosynthesis transport protein                                                      |
| 639298871 | Atu3553 | hypothetical protein                                                                              |
| 639298873 | Atu3555 | hypothetical protein                                                                              |
| 639298876 | Atu3558 | glycosyltransferase                                                                               |
| 639298880 | Atu3562 | hypothetical protein                                                                              |
| 639298885 | Atu3567 | hypothetical protein                                                                              |

|           |         |                                                               |
|-----------|---------|---------------------------------------------------------------|
| 639298887 | Atu3569 | hypothetical protein                                          |
| 639298891 | Atu3573 | hypothetical protein                                          |
| 639298973 | Atu3655 | antioxidant enzyme                                            |
| 639299093 | Atu3775 | hypothetical protein                                          |
| 639299141 | Atu3823 | methionine synthase (B12-independent) (EC 2.1.1.14) (IMGterm) |
| 639299142 | Atu3824 | hypothetical protein                                          |
| 639299180 | Atu3862 | hypothetical protein                                          |
| 639299232 | Atu3914 | cytoplasmic alpha-amylase                                     |
| 639299234 | Atu3916 | exogenous ferric siderophore receptor                         |
| 639299313 | Atu3995 | transcriptional regulator, AraC family (IMGterm)              |
| 639299314 | Atu3996 | hypothetical protein                                          |
| 639299358 | Atu4040 | hypothetical protein                                          |
| 639299418 | Atu4100 | hypothetical protein                                          |
| 639299419 | Atu4101 | hypothetical protein                                          |
| 639299424 | Atu4106 | hypothetical protein                                          |



|           |         |                                                              |
|-----------|---------|--------------------------------------------------------------|
| 639299520 | Atu4202 | methyltransferase                                            |
| 639299664 | Atu4346 | hypothetical protein                                         |
| 639299696 | Atu4378 | hypothetical protein                                         |
| 639299898 | Atu4580 | hypothetical protein                                         |
| 639299906 | Atu4588 | sodium bile acid symporter family protein                    |
| 639299907 | Atu4589 | probable transmembrane transport protein                     |
| 639299932 | Atu4614 | glycosyltransferase                                          |
| 639299961 | Atu4643 | hypothetical protein                                         |
| 639299974 | Atu4656 | hypothetical protein                                         |
| 639299987 | Atu4669 | hypothetical protein                                         |
| 639300052 | Atu4734 | aconitase (EC 4.2.1.3) (IMGterm)                             |
| 639300069 | Atu4751 | hypothetical protein                                         |
| 639300106 | Atu4788 | hypothetical protein                                         |
| 639300110 | Atu4792 | hypothetical protein                                         |
| 639300129 | Atu4811 | undecaprenyl-phosphate alpha N-acetylglucosaminyltransferase |

|           |         |                      |
|-----------|---------|----------------------|
| 639300130 | Atu4812 | hypothetical protein |
| 639300131 | Atu4813 | hypothetical protein |
| 639300133 | Atu4815 | glycosyltransferase  |
| 639300134 | Atu4816 | glycosyltransferase  |
| 639300135 | Atu4817 | glycosyltransferase  |
| 639300371 | Atu5157 | hypothetical protein |
| 639300488 | Atu5275 | hypothetical protein |
| 639300572 | Atu5360 | hypothetical protein |
| 639300641 | Atu5430 | hypothetical protein |
| 639300642 | Atu5431 | hypothetical protein |
| 639300697 | Atu5487 | hypothetical protein |

189

190

191

192

193 **Supplemental References**

- 194 1. **Sambrook J, Fritsch E, Maniatis T.** 1989. Molecular Cloning: A Laboratory Manual. Cold Spring Harbor Laboratory Press, New York.
- 195 2. **Slater SC, Goldman BS, Goodner B, Setubal JC, Farrand SK, Nester EW, Burr TJ, Banta L, Dickerman AW, Paulsen I, Otten L, Suen G, Welch R, Almeida NF,**  
196 **Arnold F, Burton OT, Du Z, Ewing A, Godsy E, Heisel S, Houmiel KL, Jhaveri J, Lu J, Miller NM, Norton S, Chen Q, Phoolcharoen W, Ohlin V, Ondrusek D,**  
197 **Pride N, Stricklin SL, Sun J, Wheeler C, Wilson L, Zhu H, Wood DW.** 2009. Genome sequences of three *Agrobacterium* biovars help elucidate the evolution of  
198 multichromosome genomes in bacteria. *J Bacteriol* **191**:2501-2511.
- 199 3. **Goodner BW, Markelz BP, Flanagan MC, Crowell CB, Jr., Racette JL, Schilling BA, Halfon LM, Mellors JS, Grabowski G.** 1999. Combined genetic and physical  
200 map of the complex genome of *Agrobacterium tumefaciens*. *J Bacteriol* **181**:5160-5166.
- 201 4. **Goodner B, Hinkle G, Gattung S, Miller N, Blanchard M, Quorollo B, Goldman BS, Cao YW, Askenazi M, Halling C, Mullin L, Houmiel K, Gordon J, Vaudin M,**  
202 **Iartchouk O, Epp A, Liu F, Wollam C, Allinger M, Doughty D, Scott C, Lappas C, Markelz B, Flanagan C, Crowell C, Gurson J, Lomo C, Sear C, Strub G, Cielo**  
203 **C, Slater S.** 2001. Genome sequence of the plant pathogen and biotechnology agent *Agrobacterium tumefaciens* C58. *Science* **294**:2323-2328.
- 204 5. **Wood DW, Setubal JC, Kaul R, Monks DE, Kitajima JP, Okura VK, Zhou Y, Chen L, Wood GE, Almeida NF, Woo L, Chen YC, Paulsen IT, Eisen JA, Karp**  
205 **PD, Bovee D, Chapman P, Clendenning J, Deatherage G, Gillet W, Grant C, Kutayavin T, Levy R, Li MJ, McClelland E, Palmieri A, Raymond C, Rouse G,**  
206 **Saenphimmachak C, Wu ZN, Romero P, Gordon D, Zhang SP, Yoo HY, Tao YM, Biddle P, Jung M, Krespan W, Perry M, Gordon-Kamm B, Liao L, Kim S,**  
207 **Hendrick C, Zhao ZY, Dolan M, Chumley F, Tingey SV, Tomb JF, Gordon MP, Olson MV, Nester EW.** 2001. The genome of the natural genetic engineer  
208 *Agrobacterium tumefaciens* C58. *Science* **294**:2317-2323.
- 209 6. **Peterson JD, Umayam LA, Dickinson T, Hickey EK, White O.** 2001. The Comprehensive Microbial Resource. *Nucleic Acids Res* **29**:123-125.
- 210 7. **Larsen TS, Krogh A.** 2003. EasyGene--a prokaryotic gene finder that ranks ORFs by statistical significance. *BMC Bioinformatics* **4**:21.
- 211 8. **Young JP, Crossman LC, Johnston AW, Thomson NR, Ghazoui ZF, Hull KH, Wexler M, Curson AR, Todd JD, Poole PS, Mauchline TH, East AK, Quail MA,**  
212 **Churcher C, Arrowsmith C, Cherevach I, Chillingworth T, Clarke K, Cronin A, Davis P, Fraser A, Hance Z, Hauser H, Jagels K, Moule S, Mungall K,**  
213 **Norbertczak H, Rabinowitsch E, Sanders M, Simmonds M, Whitehead S, Parkhill J.** 2006. The genome of *Rhizobium leguminosarum* has recognizable core and  
214 accessory components. *Genome Biol* **7**:R34.
- 215 9. **Galibert F, Finan TM, Long SR, Puhler A, Abola P, Ampe F, Barloy-Hubler F, Barnett MJ, Becker A, Boistard P, Bothe G, Boutry M, Bowser L, Buhrmester J,**  
216 **Cadiou E, Capela D, Chain P, Cowie A, Davis RW, Dreano S, Federspiel NA, Fisher RF, Gloux S, Godrie T, Goffeau A, Golding B, Gouzy J, Gurjal M,**  
217 **Hernandez-Lucas I, Hong A, Huizar L, Hyman RW, Jones T, Kahn D, Kahn ML, Kalman S, Keating DH, Kiss E, Komp C, Lelaure V, Masuy D, Palm C, Peck**  
218 **MC, Pohl TM, Portetelle D, Purnelle B, Ramsperger U, Surzycki R, Thebault P, Vandenbol M, Vorholter F-J, Weidner S, Wells DH, Wong K, Yeh K-C, Batut J.**  
219 2001. The Composite Genome of the Legume Symbiont *Sinorhizobium meliloti*. *Science* **293**:668-672.

- 220 10. **Barnett MJ, Fisher RF, Jones T, Komp C, Abola AP, Barloy-Hubler F, Bowser L, Capela D, Galibert F, Gouzy J, Gurjal M, Hong A, Huizar L, Hyman RW,**  
221 **Kahn D, Kahn ML, Kalman S, Keating DH, Palm C, Peck MC, Surzycki R, Wells DH, Yeh KC, Davis RW, Federspiel NA, Long SR.** 2001. Nucleotide sequence  
222 and predicted functions of the entire *Sinorhizobium meliloti* pSymA megaplasmid. Proc Natl Acad Sci U S A **98**:9883-9888.
- 223 11. **Gonzalez V, Santamaria RI, Bustos P, Hernandez-Gonzalez I, Medrano-Soto A, Moreno-Hagelsieb G, Janga SC, Ramirez MA, Jimenez-Jacinto V, Collado-Vides**  
224 **J, Davila G.** 2006. The partitioned *Rhizobium etli* genome: Genetic and metabolic redundancy in seven interacting replicons. Proceedings of the National Academy of  
225 Sciences of the United States of America **103**:3834-3839.
- 226 12. **Kaneko T, Nakamura Y, Sato S, Asamizu E, Kato T, Sasamoto S, Watanabe A, Idesawa K, Ishikawa A, Kawashima K, Kimura T, Kishida Y, Kiyokawa C,**  
227 **Kohara M, Matsumoto M, Matsuno A, Mochizuki Y, Nakayama S, Nakazaki N, Shimpo S, Sugimoto M, Takeuchi C, Yamada M, Tabata S.** 2000. Complete  
228 genome structure of the nitrogen-fixing symbiotic bacterium *Mesorhizobium loti*. DNA Res **7**:331-338.
- 229 13. **Capela D, Barloy-Hubler F, Gouzy J, Bothe G, Ampe F, Batut J, Boistard P, Becker A, Boutry M, Cadieu E, Dreano S, Gloux S, Godrie T, Goffeau A, Kahn D,**  
230 **Kiss E, Lelaure V, Masuy D, Pohl T, Portetelle D, Puhler A, Purnelle B, Ramsperger U, Renard C, Thebault P, Vandebol M, Weidner S, Galibert F.** 2001.  
231 Analysis of the chromosome sequence of the legume symbiont *Sinorhizobium meliloti* strain 1021. Proc Natl Acad Sci U S A **98**:9877-9882.
- 232 14. **Li L, Stoeckert CJ, Jr., Roos DS.** 2003. OrthoMCL: identification of ortholog groups for eukaryotic genomes. Genome Res **13**:2178-2189.
- 233 15. **Altschul SF, Madden TL, Schaffer AA, Zhang J, Zhang Z, Miller W, Lipman DJ.** 1997. Gapped BLAST and PSI-BLAST: a new generation of protein database search  
234 programs. Nucleic Acids Res **25**:3389-3402.
- 235 16. **Haft DH, Selengut JD, White O.** 2003. The TIGRFAMs database of protein families. Nucleic Acids Res **31**:371-373.
- 236 17. <http://www.sanger.ac.uk/Software/Rfam>.
- 237 18. **Reinhold-Hurek B, Shub DA.** 1992. Self-splicing introns in tRNA genes of widely divergent bacteria. Nature **357**:173-176.
- 238 19. **Wilms I, Overloper A, Nowrousian M, Sharma CM, Narberhaus F.** 2012. Deep sequencing uncovers numerous small RNAs on all four replicons of the plant pathogen  
239 *Agrobacterium tumefaciens*. RNA biology **9**:446-457.
- 240 20. **Yu GX, Snyder EE, Boyle SM, Crasta OR, Czar M, Mane SP, Purkayastha A, Sobral B, Setubal JC.** 2007. A versatile computational pipeline for bacterial genome  
241 annotation improvement and comparative analysis, with *Brucella* as a use case. Nucleic Acids Res **35**:3953-3962.
- 242 21. **Hamilton RH, Fall MZ.** 1971. The loss of tumor-initiating ability in *Agrobacterium tumefaciens* by incubation at high temperature. Experientia **27**:229-230.
- 243 22. **Hamilton RH.** 2005. Commentary on the paper: Hamilton, R. H., and Fall, M.Z. 1971. The loss of tumor-inhabiting ability in *Agrobacterium tumefaciens* by incubation at  
244 high temperature., p. 45. In Nester E, Gordon MP, Kerr A (ed.), *Agrobacterium tumefaciens: From Plant Pathology to Biotechnology*. APS Press, The American  
245 Phytopathological Society, St. Paul, MN.
- 246 23. **Van Larebeke N, Engler G, Holsters M, Van den Elsacker S, Zaenen I, Schilperoort RA, Schell J.** 1974. Large plasmid in *Agrobacterium tumefaciens* essential for  
247 crown gall-inducing ability. Nature **252**:169-170.
- 248 24. **Tempé J, Petit A, Holsters M, Montagu MV, Schell J.** 1977. Thermosensitive step associated with transfer of the Ti plasmid during conjugation: Possible relation to  
249 transformation in crown gall. Proc Natl Acad Sci U S A **74**:2848-2849.
- 250 25. **Rosenberg C, Huguet T.** 1984. The pAtC58 plasmid of *Agrobacterium tumefaciens* is not essential for tumour induction. Mol. Gen. Genet. **196**:533-536

251  
252  
253  
254  
255

26. **Ellis JG, Murphy PJ, Kerr A.** 1982. Isolation and properties of transfer regulatory mutants of the nopaline Ti-plasmid pTiC58. *Molecular and General Genetics* **186**:275-281.
