# Supplementary material
Source: PubMed Central journal article supplement (PMC3568625)

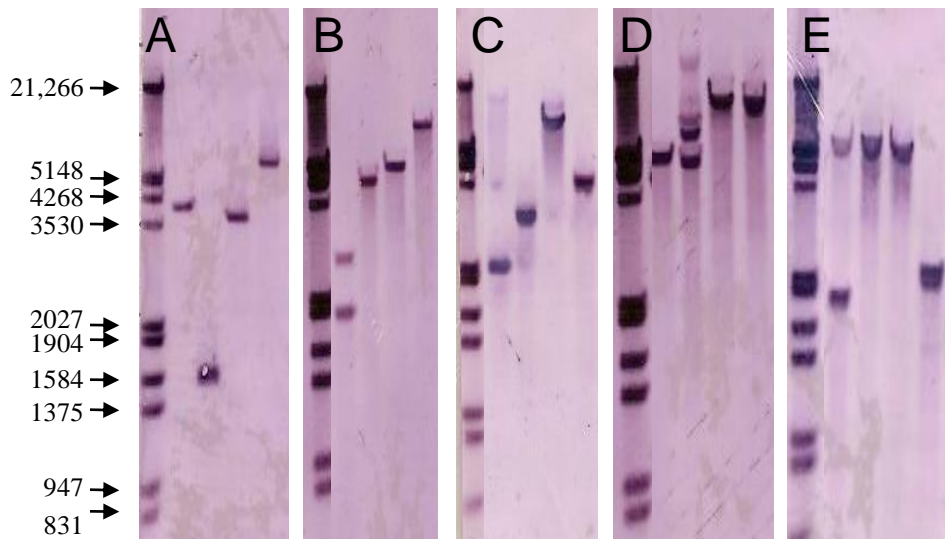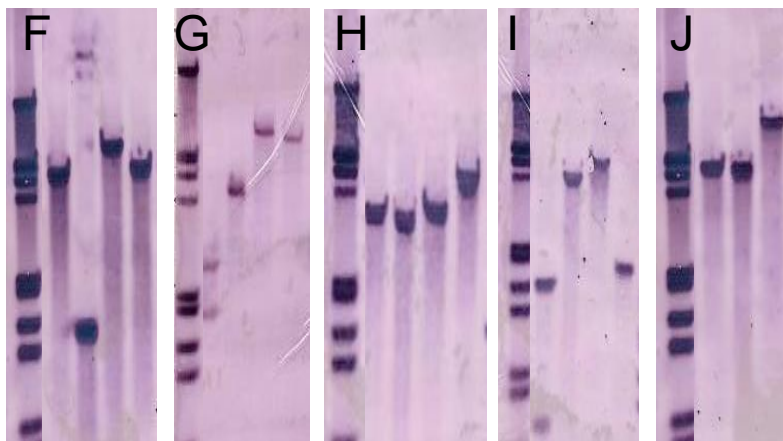

Supplement: AEM.03192-12_zam999104122so1.pdf [file AEM.03192-12_zam999104122so1.pdf]
